# Supplementary material for: Synthesis of a CdSe–graphene hybrid composed of CdSe quantum dot arrays directly grown on CVD-graphene and its ultrafast carrier dynamics
Source: Royal Society of Chemistry journal article supplement (doi:10.1039/c2nr33294a), 2012-12-20
Supplement: c2nr33294a.pdf [file c2nr33294a.pdf]

## Supporting Information

# Synthesis of CdSe/Graphene Hybrid Composed of CdSe Quantum Dot Arrays Directly Grown on CVD-Graphene and its Ultrafast Carrier Dynamics

*Yong-Tae Kim,<sup>†</sup> Hee-Won Shin,<sup>§</sup> Young-Seon Ko,<sup>‡</sup> Tae Kyu Ahn,<sup>§</sup> Young-Uk Kwon<sup>†,‡,\*</sup>*

Department of Chemistry, BK-21 School of Chemical Materials Sciences and SKKU Advanced Institute of Nanotechnology, Department of Energy Science, Sungkyunkwan University, Suwon 440-746, Korea.

### TEM image of a mesoporous silica thin film

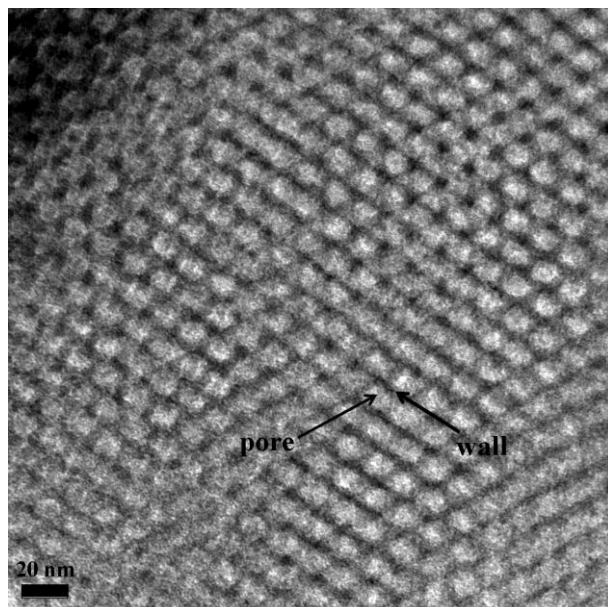

**Figure S1.** Top-view TEM image of MSTF. MSTF is composed of ordered 8 nm sized pores in the hexagonal symmetry.

### AFM images of CdSe QD/G

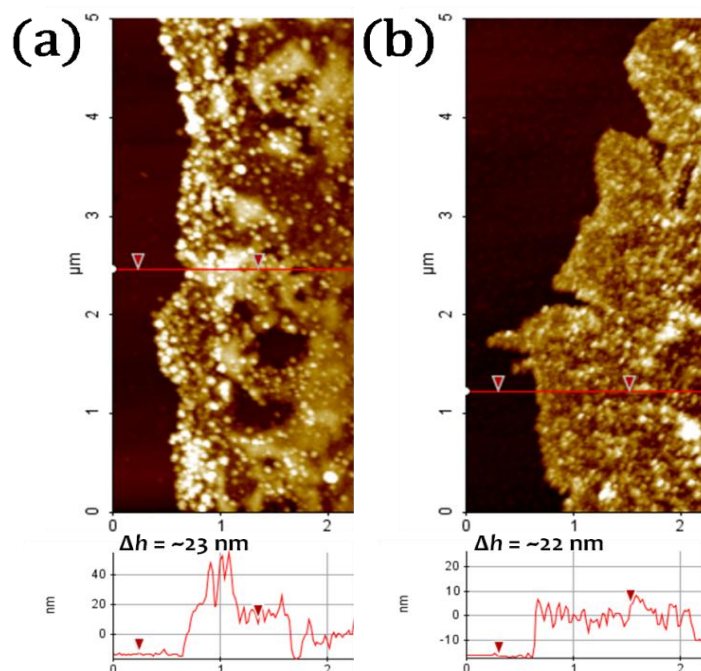

**Figure S2.** AFM images of T-QD/G samples. Based on the readings of the AFM plots, the samples in (a) and (b) have the same height of  $\sim 20 \text{ nm}$ . The samples in (a) and (b) has been prepared separately, but with the same amount of deposition time.

**Fluorescence life-time measurement data**

**Table S1.** Emission decay of CdSe QDs. (excitation at 485 nm diode laser, detection at 640 nm)

|             | $\alpha_1$ | $\tau_1(\text{ns})$ | $\alpha_2$ | $\tau_2(\text{ns})$ | $\alpha_3$ | $\tau_3(\text{ns})$ | $\langle\tau\rangle(\text{ns})$ |
|-------------|------------|---------------------|------------|---------------------|------------|---------------------|---------------------------------|
| D-QD/Quartz | 0.52       | 0.537               | 0.38       | 2.51                | 0.1        | 11.5                | 6.62                            |
| D-QD/G      | 0.75       | 0.176               | 0.21       | 0.98                | 0.04       | 4.67                | 2.09                            |

These values were used to estimate the average lifetime of CdSe emission decay using the expression.<sup>1</sup>

$$\langle\tau\rangle = \frac{\alpha_1 \tau_1^2 + \alpha_2 \tau_2^2 + \alpha_3 \tau_3^2}{\alpha_1 \tau_1 + \alpha_2 \tau_2 + \alpha_3 \tau_3}$$

Raman spectra of three-layer graphene (3LG) and CdSe QD/3LG

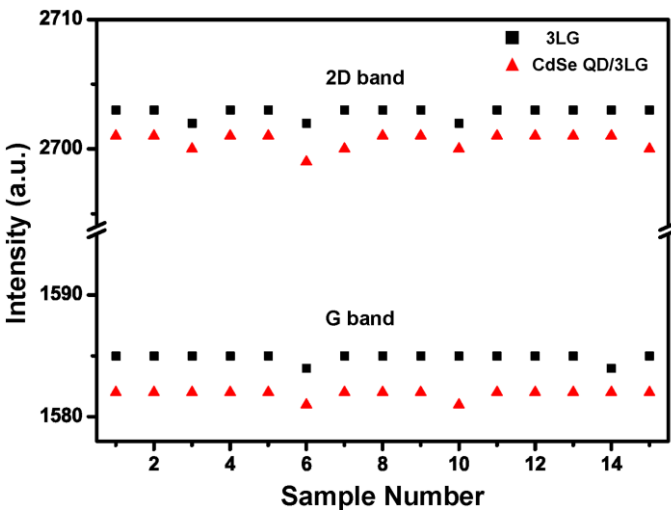

**Figure S3.** G peak and 2D peak positions before and after the deposition of CdSe QDs on tri-layer graphene.

### Current-voltage characteristics of the CdSe QDs on graphene

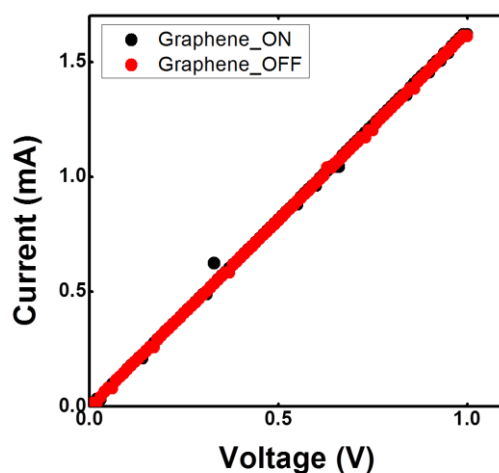

**Figure S4.** Current-voltage characteristics of a device made of intrinsic graphene without CdSe QDs

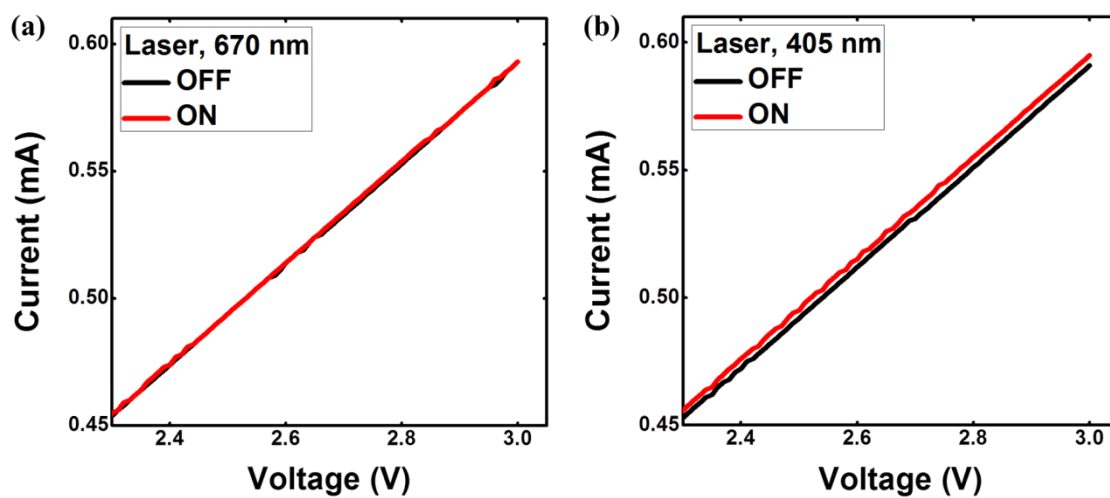

**Figure S5.** Current-voltage characteristics of T-QD/3LG with and without irradiation of laser with different wavelengths: (a) 670 nm; (b) 405 nm. Light source used LDH-P-C-405B (power: 1 mW) for 405 nm and LDH-P-670 (power: 0.3 mW) for 670 nm.

### Photographs of CdSe QDs/graphene on a PET film

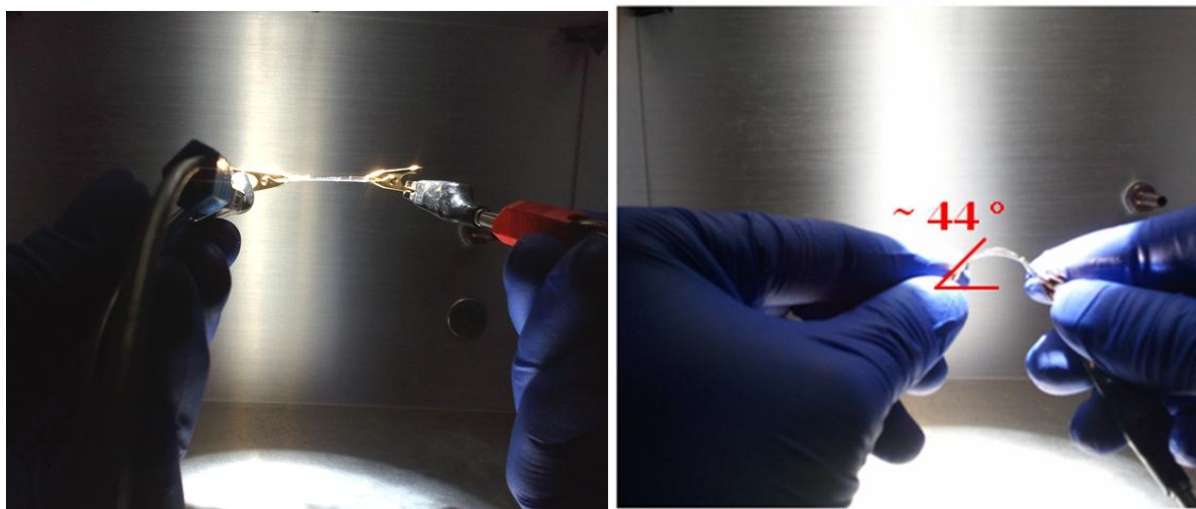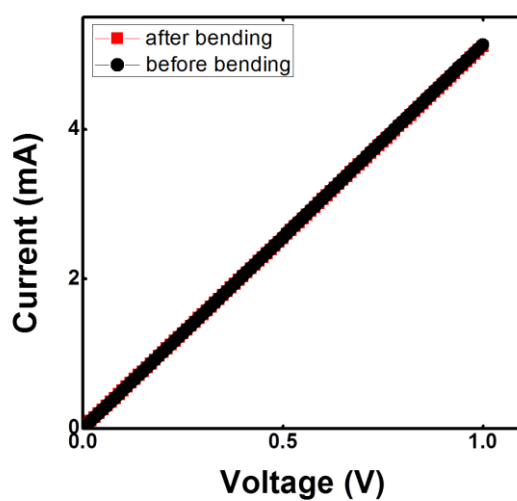

**Figure S6.** Photographs and current-voltage characteristics of the CdSe QD/G on a PET film with and without bending under visible illumination.

### References

1. Farrow, B.; Kamat, P. V. *J. Am. Chem. Soc.*, **2009**, *131*, 11124–11131.
